# Supplementary material for: Breast Milk MicroRNAs Related to Leptin and Adiponectin Function Can Be Modulated by Maternal Diet and Influence Offspring Phenotype in Rats
Source: MDPI journal article supplement (doi:10.3390/ijms23137237), 2022-06-29
Supplement: s1 [file s1]

**Table S1.** Nucleotide sequences of the primers used and amplicon size in base pairs (bp) of the studied genes.

| <b>Gene symbol</b> | <b>Forward primer</b> | <b>Reverse primer</b> | <b>Amplicon size (bp)</b> |
|--------------------|-----------------------|-----------------------|---------------------------|
| <i>Adipoq</i>      | GCTCAGGATGCTACTGTTG   | TCTCACCCCTTAGGACCAAG  | 241                       |
| <i>Adipor1</i>     | AGCACCGGCAGACAAGAG    | GGTGGGTACAACACCACTCA  | 62                        |
| <i>Adipor2</i>     | AAAAGGAAAGGCAGAGAATGG | TACACACAGAGACGGGCAAC  | 168                       |
| <i>Cpt1a</i>       | GCTCGCACATTACAAGGACAT | TGGACACCACATAGAGGCAG  | 250                       |
| <i>Cpt1b</i>       | GCAAACCTGGACCGAGAAGAG | CCTTGAAGAAGCGACCTTTG  | 180                       |
| <i>Fasn</i>        | AGAGAGAGGGCTGTGCTTGC  | CTGAGGTCCAGAGATGGTCA  | 179                       |
| <i>Gdi</i>         | CCGCACAAGGCAAATACATC  | GACTCTCTGAACCGTCATCA  | 159                       |
| <i>Lep</i>         | TTCACACACGCAGTCGGTAT  | AGGTCTCGCAGGTTCTCCAG  | 186                       |
| <i>Lepr</i>        | AGCCAAACAAAAGCACCATT  | TCCTGAGCCATCCAGTCTCT  | 174                       |
| <i>Pnpla2</i>      | TCGTATCACCAACACCAGCA  | CCCTCCAGTCCTCTCCTCA   | 244                       |
| <i>Pparg</i>       | GATCCTCCTGTTGACCCAGA  | TCAAAGGAATGGGAGTGGTC  | 164                       |
| <i>Scd1</i>        | ATCCCCTCCTCCAAGGTCTA  | CGGGCCCATTATATACATC   | 188                       |
| <i>Srebp1</i>      | CCCACCCCTTACACACC     | GCCTGCGGTCTTCATTGT    | 198                       |
| <i>Ucp1</i>        | GGGCTGATTCTTTTGGTCT   | GGTGGTGATGGTCCCTAAGA  | 229                       |
| <i>β-actin</i>     | TACAGCTTCACCACCACAGC  | TCTCCAGGGAGGAAGAGGAT  | 120                       |

**Table S2.** Associations between leptin and adiponectin concentrations and maternal parameters throughout lactation with the expression of selected miRNAs in milk at day 5 (d5). To study the effect of the TX diet, data was divided in both groups. Statistics: r, Spearman rank coefficient significant at \*, p≤0.05; \*\*, p≤0.00.

|          |         |   | Leptin  |        |         |        |         |        |        |        | Adiponectin |        |        |        |        | Maternal body weight |        |        |         | Maternal body fat |        |        |        | Cumulative intake |     |     |         |
|----------|---------|---|---------|--------|---------|--------|---------|--------|--------|--------|-------------|--------|--------|--------|--------|----------------------|--------|--------|---------|-------------------|--------|--------|--------|-------------------|-----|-----|---------|
|          |         |   | Milk    |        |         | Plasma |         |        |        |        | Milk        |        |        | Plasma |        |                      |        |        |         |                   |        |        |        |                   |     |     |         |
| d5       |         |   | d5      | d10    | d15     |        | d5      | d10    | d15    | d21    | d5          | d10    | d15    |        | d5     | d10                  | d15    | d21    | d5      | d10               | d15    | d21    | d5     | d10               | d15 | d21 | d21     |
| miR-26a  | Control | r | -0.857* | -0.357 | 0.107   |        | -0.214  | -0.464 | -0.250 | 0.107  | -0.577      | 0.000  | -0.250 | 0.505  | 0.500  | 0.500                | -0.214 | -0.360 | -0.214  | -0.273            | 0.107  | -0.143 | 0.000  | 0.000             |     |     | 0.107   |
|          |         | p | 0.014   | 0.432  | 0.819   |        | 0.645   | 0.294  | 0.589  | 0.819  | 0.175       | 1.000  | 0.589  | 0.248  | 0.391  | 0.253                | 0.645  | 0.427  | 0.645   | 0.554             | 0.819  | 0.760  | 1.000  | 1.000             |     |     | 0.819   |
|          | TX      | r | 0.714   | 0.607  | 0.679   |        | 0.986** | 0.786* | 0.500  | 0.393  | 0.750       | 0.571  | 0.321  | 0.679  | 0.700  | 0.250                | 0.793* | 0.857* | 1.000** | 0.893**           | 0.393  | 0.214  | 0.286  | 0.321             |     |     | 0.750   |
|          |         | p | 0.071   | 0.148  | 0.094   |        | 0.000   | 0.036  | 0.253  | 0.383  | 0.052       | 0.180  | 0.482  | 0.094  | 0.188  | 0.589                | 0.033  | 0.014  |         | 0.007             | 0.383  | 0.645  | 0.535  | 0.482             |     |     | 0.052   |
| miR-27a  | Control | r | -0.857* | -0.250 | 0.143   |        | -0.214  | -0.429 | -0.250 | 0.286  | -0.378      | 0.071  | -0.107 | 0.595  | 0.600  | 0.500                | -0.179 | -0.234 | -0.179  | -0.018            | 0.143  | -0.071 | 0.250  | 0.250             |     |     | 0.107   |
|          |         | p | 0.014   | 0.589  | 0.760   |        | 0.645   | 0.337  | 0.589  | 0.535  | 0.403       | 0.879  | 0.819  | 0.159  | 0.285  | 0.253                | 0.702  | 0.613  | 0.702   | 0.969             | 0.760  | 0.879  | 0.589  | 0.589             |     |     | 0.819   |
|          | TX      | r | 0.643   | 0.714  | 0.821*  |        | 0.812*  | 0.857* | 0.857* | 0.607  | 0.857*      | 0.607  | 0.607  | 0.643  | 0.900* | 0.571                | 0.487  | 0.571  | 0.857*  | 0.857*            | 0.357  | 0.286  | 0.357  | 0.500             |     |     | 0.571   |
|          |         | p | 0.119   | 0.071  | 0.023   |        | 0.050   | 0.014  | 0.014  | 0.148  | 0.014       | 0.148  | 0.148  | 0.119  | 0.037  | 0.180                | 0.268  | 0.180  | 0.014   | 0.014             | 0.432  | 0.535  | 0.432  | 0.253             |     |     | 0.180   |
| miR-29a  | Control | r | -0.857* | -0.286 | -0.107  |        | -0.214  | -0.393 | -0.286 | 0.000  | -0.559      | -0.214 | -0.500 | 0.414  | 0.600  | 0.357                | -0.107 | -0.234 | -0.107  | -0.164            | 0.214  | -0.071 | 0.000  | 0.000             |     |     | 0.107   |
|          |         | p | 0.014   | 0.535  | 0.819   |        | 0.645   | 0.383  | 0.535  | 1.000  | 0.192       | 0.645  | 0.253  | 0.355  | 0.285  | 0.432                | 0.819  | 0.613  | 0.819   | 0.726             | 0.645  | 0.879  | 1.000  | 1.000             |     |     | 0.819   |
|          | TX      | r | 0.679   | 0.643  | 0.429   |        | 0.986** | 0.571  | 0.179  | 0.107  | 0.571       | 0.321  | 0.000  | 0.357  | 0.700  | -0.036               | 0.811* | 0.857* | 0.893** | 0.714             | 0.071  | -0.107 | 0.036  | 0.000             |     |     | 0.714   |
|          |         | p | 0.094   | 0.119  | 0.337   |        | 0.000   | 0.180  | 0.702  | 0.819  | 0.180       | 0.482  | 1.000  | 0.432  | 0.188  | 0.939                | 0.027  | 0.014  | 0.007   | 0.071             | 0.879  | 0.819  | 0.939  | 1.000             |     |     | 0.071   |
| miR-103  | Control | r | -0.750  | -0.393 | 0.071   |        | -0.250  | -0.500 | -0.214 | 0.214  | -0.450      | -0.071 | -0.179 | 0.631  | 0.100  | 0.643                | -0.143 | -0.306 | -0.143  | -0.109            | 0.036  | -0.179 | -0.071 | -0.071            |     |     | 0.250   |
|          |         | p | 0.052   | 0.383  | 0.879   |        | 0.589   | 0.253  | 0.645  | 0.645  | 0.310       | 0.879  | 0.702  | 0.129  | 0.873  | 0.119                | 0.760  | 0.504  | 0.760   | 0.816             | 0.939  | 0.702  | 0.879  | 0.879             |     |     | 0.589   |
|          | TX      | r | 0.643   | 0.679  | 0.786*  |        | 0.928** | 0.750  | 0.643  | 0.357  | 0.857*      | 0.464  | 0.357  | 0.643  | 0.700  | 0.286                | 0.757* | 0.821* | 0.964** | 0.857*            | 0.286  | 0.143  | 0.179  | 0.250             |     |     | 0.714   |
|          |         | p | 0.119   | 0.094  | 0.036   |        | 0.008   | 0.052  | 0.119  | 0.432  | 0.014       | 0.294  | 0.432  | 0.119  | 0.188  | 0.535                | 0.049  | 0.023  | 0.000   | 0.014             | 0.535  | 0.760  | 0.702  | 0.589             |     |     | 0.071   |
| miR-200a | Control | r | -0.750  | -0.393 | 0.071   |        | -0.250  | -0.500 | -0.214 | 0.214  | -0.450      | -0.071 | -0.179 | 0.631  | 0.100  | 0.643                | -0.143 | -0.306 | -0.143  | -0.109            | 0.036  | -0.179 | -0.071 | -0.071            |     |     | 0.250   |
|          |         | p | 0.052   | 0.383  | 0.879   |        | 0.589   | 0.253  | 0.645  | 0.645  | 0.310       | 0.879  | 0.702  | 0.129  | 0.873  | 0.119                | 0.760  | 0.504  | 0.760   | 0.816             | 0.939  | 0.702  | 0.879  | 0.879             |     |     | 0.589   |
|          | TX      | r | 0.786*  | 0.857* | 0.607   |        | 0.812*  | 0.857* | 0.429  | 0.500  | 0.714       | 0.679  | 0.429  | 0.357  | 0.900* | 0.393                | 0.468  | 0.571  | 0.857*  | 0.964**           | 0.143  | 0.000  | 0.214  | 0.429             |     |     | 0.679   |
|          |         | p | 0.036   | 0.014  | 0.148   |        | 0.050   | 0.014  | 0.337  | 0.253  | 0.071       | 0.094  | 0.337  | 0.432  | 0.037  | 0.383                | 0.289  | 0.180  | 0.014   | 0.000             | 0.760  | 1.000  | 0.645  | 0.337             |     |     | 0.094   |
| miR-200b | Control | r | -0.714  | -0.250 | 0.036   |        | -0.179  | -0.393 | -0.143 | 0.286  | -0.306      | -0.214 | -0.214 | 0.667  | 0.100  | 0.607                | 0.000  | -0.126 | 0.000   | 0.073             | 0.179  | -0.036 | 0.071  | 0.071             |     |     | 0.286   |
|          |         | p | 0.071   | 0.589  | 0.939   |        | 0.702   | 0.383  | 0.760  | 0.535  | 0.504       | 0.645  | 0.645  | 0.102  | 0.873  | 0.148                | 1.000  | 0.788  | 1.000   | 0.877             | 0.702  | 0.939  | 0.879  | 0.879             |     |     | 0.535   |
|          | TX      | r | 0.714   | 0.643  | 0.643   |        | 0.899*  | 0.643  | 0.286  | 0.179  | 0.714       | 0.357  | 0.036  | 0.429  | 0.600  | -0.036               | 0.811* | 0.857* | 0.929** | 0.821*            | 0.071  | -0.143 | 0.000  | 0.071             |     |     | 0.893** |
|          |         | p | 0.071   | 0.119  | 0.119   |        | 0.015   | 0.119  | 0.535  | 0.702  | 0.071       | 0.432  | 0.939  | 0.337  | 0.285  | 0.939                | 0.027  | 0.014  | 0.003   | 0.023             | 0.879  | 0.760  | 1.000  | 0.879             |     |     | 0.007   |
| miR-221  | Control | r | -0.214  | -0.321 | -0.786* |        | -0.429  | -0.357 | -0.393 | -0.036 | -0.018      | -0.536 | -0.714 | 0.270  | -0.100 | 0.214                | 0.179  | 0.126  | 0.179   | 0.564             | -0.143 | -0.286 | -0.357 | -0.357            |     |     | 0.429   |
|          |         | p | 0.645   | 0.482  | 0.036   |        | 0.337   | 0.432  | 0.383  | 0.939  | 0.969       | 0.215  | 0.071  | 0.558  | 0.873  | 0.645                | 0.702  | 0.788  | 0.702   | 0.187             | 0.760  | 0.535  | 0.432  | 0.432             |     |     | 0.337   |
|          | TX      | r | 0.929** | 0.429  | 0.107   |        | 0.696   | 0.786* | 0.214  | 0.786* | 0.071       | 0.714  | 0.179  | 0.143  | 0.200  | 0.321                | 0.054  | 0.107  | 0.500   | 0.536             | 0.214  | 0.143  | 0.679  | 0.679             |     |     | 0.571   |
|          |         | p | 0.003   | 0.337  | 0.819   |        | 0.125   | 0.036  | 0.645  | 0.036  | 0.879       | 0.071  | 0.702  | 0.760  | 0.747  | 0.482                | 0.908  | 0.819  | 0.253   | 0.215             | 0.645  | 0.760  | 0.094  | 0.094             |     |     | 0.180   |
| miR-222  | Control | r | -0.714  | -0.429 | 0.179   |        | -0.179  | -0.536 | -0.143 | 0.321  | -0.414      | 0.000  | -0.214 | 0.703  | 0.100  | 0.750                | -0.071 | -0.270 | -0.071  | -0.164            | 0.000  | -0.250 | -0.107 | -0.107            |     |     | 0.393   |
|          |         | p | 0.071   | 0.337  | 0.702   |        | 0.702   | 0.215  | 0.760  | 0.482  | 0.355       | 1.000  | 0.645  | 0.078  | 0.873  | 0.052                | 0.879  | 0.558  | 0.879   | 0.726             | 1.000  | 0.589  | 0.819  | 0.819             |     |     | 0.383   |
|          | TX      | r | 0.679   | 0.393  | 0.679   |        | 0.754   | 0.643  | 0.321  | 0.357  | 0.607       | 0.429  | 0.071  | 0.464  | 0.300  | 0.000                | 0.577  | 0.607  | 0.750   | 0.750             | 0.179  | -0.036 | 0.143  | 0.286             |     |     | 0.929** |
|          |         | p | 0.094   | 0.383  | 0.094   |        | 0.084   | 0.119  | 0.482  | 0.432  | 0.148       | 0.337  | 0.879  | 0.294  | 0.624  | 1.000                | 0.175  | 0.148  | 0.052   | 0.052             | 0.702  | 0.939  | 0.760  | 0.535             |     |     | 0.003   |

**Table S3.** Associations between leptin and adiponectin concentrations and maternal parameters throughout lactation with the expression of selected miRNAs in milk at day 15 (d15). To study the effect of the TX diet, data was divided in both groups. Statistics: r, Spearman rank coefficient significant at \*,  $p \leq 0.05$ ; \*\*,  $p \leq 0.00$ .

|          |         |   | Leptin        |               |        |               |        |               |        |        | Adiponectin    |        |        |                |        | Maternal body weight |               |                |        | Maternal body fat |                 |        |        | Cumulative intake |
|----------|---------|---|---------------|---------------|--------|---------------|--------|---------------|--------|--------|----------------|--------|--------|----------------|--------|----------------------|---------------|----------------|--------|-------------------|-----------------|--------|--------|-------------------|
| d15      |         |   | Milk          |               |        | Plasma        |        |               |        |        | Milk           |        |        | Plasma         |        | d5                   | d10           | d15            | d21    | d5                | d10             | d15    | d21    | d21               |
| miR-26a  | Control | r | 0.036         | -0.214        | -0.714 | -0.429        | -0.143 | -0.286        | -0.321 | -0.090 | -0.607         | -0.214 | 0.018  | -0.800         | 0.036  | -0.036               | -0.090        | -0.036         | 0.382  | -0.143            | -0.071          | -0.464 | -0.464 | 0.036             |
|          |         | p | 0.939         | 0.645         | 0.071  | 0.337         | 0.760  | 0.535         | 0.482  | 0.848  | 0.148          | 0.645  | 0.969  | 0.104          | 0.939  | 0.939                | 0.848         | 0.939          | 0.398  | 0.760             | 0.879           | 0.294  | 0.294  | 0.939             |
|          | TX      | r | 0.179         | 0.500         | 0.000  | 0.058         | -0.071 | -0.321        | -0.250 | 0.071  | -0.250         | -0.357 | -0.714 | 0.100          | -0.321 | -0.162               | -0.143        | -0.107         | 0.071  | <b>-0.857*</b>    | <b>-0.893**</b> | -0.607 | -0.357 | 0.286             |
|          |         | p | 0.702         | 0.253         | 1.000  | 0.913         | 0.879  | 0.482         | 0.589  | 0.879  | 0.589          | 0.432  | 0.071  | 0.873          | 0.482  | 0.728                | 0.760         | 0.819          | 0.879  | 0.014             | 0.007           | 0.148  | 0.432  | 0.535             |
| miR-27a  | Control | r | 0.107         | 0.179         | -0.571 | -0.036        | 0.143  | 0.036         | 0.000  | 0.288  | <b>-0.821*</b> | -0.464 | 0.144  | -0.300         | 0.000  | 0.464                | 0.468         | 0.464          | 0.655  | 0.286             | 0.250           | -0.036 | -0.036 | 0.286             |
|          |         | p | 0.819         | 0.702         | 0.180  | 0.939         | 0.760  | 0.939         | 1.000  | 0.531  | 0.023          | 0.294  | 0.758  | 0.624          | 1.000  | 0.294                | 0.289         | 0.294          | 0.111  | 0.535             | 0.589           | 0.939  | 0.939  | 0.535             |
|          | TX      | r | 0.750         | 0.607         | 0.036  | <b>0.899*</b> | 0.429  | -0.179        | 0.071  | 0.179  | 0.214          | -0.286 | -0.107 | 0.200          | -0.214 | 0.505                | 0.536         | 0.607          | 0.464  | -0.250            | -0.393          | 0.000  | -0.071 | 0.643             |
|          |         | p | 0.052         | 0.148         | 0.939  | 0.015         | 0.337  | 0.702         | 0.879  | 0.702  | 0.645          | 0.535  | 0.819  | 0.747          | 0.645  | 0.248                | 0.215         | 0.148          | 0.294  | 0.589             | 0.383           | 1.000  | 0.879  | 0.119             |
| miR-29a  | Control | r | -0.071        | -0.286        | -0.643 | -0.393        | -0.214 | -0.250        | -0.286 | -0.198 | -0.643         | -0.321 | 0.126  | -0.800         | 0.179  | 0.000                | -0.126        | 0.000          | 0.255  | -0.107            | -0.107          | -0.536 | -0.536 | 0.143             |
|          |         | p | 0.879         | 0.535         | 0.119  | 0.383         | 0.645  | 0.589         | 0.535  | 0.670  | 0.119          | 0.482  | 0.788  | 0.104          | 0.702  | 1.000                | 0.788         | 1.000          | 0.582  | 0.819             | 0.819           | 0.215  | 0.215  | 0.760             |
|          | TX      | r | 0.679         | 0.643         | 0.393  | 0.754         | 0.393  | 0.107         | 0.000  | 0.464  | 0.000          | -0.321 | -0.036 | 0.100          | -0.286 | 0.595                | 0.607         | 0.643          | 0.464  | -0.393            | -0.536          | -0.214 | -0.214 | <b>0.821*</b>     |
|          |         | p | 0.094         | 0.119         | 0.383  | 0.084         | 0.383  | 0.819         | 1.000  | 0.294  | 1.000          | 0.482  | 0.939  | 0.873          | 0.535  | 0.159                | 0.148         | 0.119          | 0.294  | 0.383             | 0.215           | 0.645  | 0.645  | 0.023             |
| miR-103  | Control | r | 0.107         | 0.000         | -0.643 | -0.286        | 0.071  | -0.179        | -0.393 | -0.036 | -0.643         | -0.143 | -0.144 | -0.800         | -0.179 | 0.000                | 0.000         | 0.000          | 0.346  | 0.036             | 0.143           | -0.286 | -0.286 | -0.143            |
|          |         | p | 0.819         | 1.000         | 0.119  | 0.535         | 0.879  | 0.702         | 0.383  | 0.939  | 0.119          | 0.760  | 0.758  | 0.104          | 0.702  | 1.000                | 1.000         | 1.000          | 0.448  | 0.939             | 0.760           | 0.535  | 0.535  | 0.760             |
|          | TX      | r | 0.536         | 0.679         | 0.321  | 0.754         | 0.250  | 0.036         | -0.143 | 0.429  | -0.143         | -0.357 | -0.214 | 0.100          | -0.321 | 0.487                | 0.500         | 0.500          | 0.357  | -0.571            | -0.679          | -0.393 | -0.357 | 0.679             |
|          |         | p | 0.215         | 0.094         | 0.482  | 0.084         | 0.589  | 0.939         | 0.760  | 0.337  | 0.760          | 0.432  | 0.645  | 0.873          | 0.482  | 0.268                | 0.253         | 0.253          | 0.432  | 0.180             | 0.094           | 0.383  | 0.432  | 0.094             |
| miR-200a | Control | r | 0.071         | -0.429        | -0.714 | -0.607        | -0.286 | -0.464        | -0.500 | -0.270 | -0.286         | -0.036 | -0.162 | <b>-0.900*</b> | -0.036 | -0.357               | -0.414        | -0.357         | 0.145  | -0.464            | -0.321          | -0.679 | -0.679 | -0.143            |
|          |         | p | 0.879         | 0.337         | 0.071  | 0.148         | 0.535  | 0.294         | 0.253  | 0.558  | 0.535          | 0.939  | 0.728  | 0.037          | 0.939  | 0.432                | 0.355         | 0.432          | 0.756  | 0.294             | 0.482           | 0.094  | 0.094  | 0.760             |
|          | TX      | r | 0.321         | 0.679         | 0.357  | 0.348         | 0.107  | 0.107         | -0.179 | 0.429  | -0.286         | -0.286 | -0.429 | 0.100          | -0.250 | 0.162                | 0.179         | 0.214          | 0.214  | <b>-0.786*</b>    | <b>-0.821*</b>  | -0.571 | -0.393 | 0.500             |
|          |         | p | 0.482         | 0.094         | 0.432  | 0.499         | 0.819  | 0.819         | 0.702  | 0.337  | 0.535          | 0.535  | 0.337  | 0.873          | 0.589  | 0.728                | 0.702         | 0.645          | 0.645  | 0.036             | 0.023           | 0.180  | 0.383  | 0.253             |
| miR-200b | Control | r | 0.036         | -0.214        | -0.714 | -0.429        | -0.143 | -0.286        | -0.321 | -0.090 | -0.607         | -0.214 | 0.018  | -0.800         | 0.036  | -0.036               | -0.090        | -0.036         | 0.382  | -0.143            | -0.071          | -0.464 | -0.464 | 0.036             |
|          |         | p | 0.939         | 0.645         | 0.071  | 0.337         | 0.760  | 0.535         | 0.482  | 0.848  | 0.148          | 0.645  | 0.969  | 0.104          | 0.939  | 0.939                | 0.848         | 0.939          | 0.398  | 0.760             | 0.879           | 0.294  | 0.294  | 0.939             |
|          | TX      | r | 0.464         | 0.571         | -0.107 | 0.754         | 0.143  | -0.179        | -0.143 | 0.071  | -0.107         | -0.357 | -0.357 | -0.100         | -0.250 | 0.306                | 0.321         | 0.321          | 0.143  | -0.500            | -0.536          | -0.214 | -0.321 | 0.321             |
|          |         | p | 0.294         | 0.180         | 0.819  | 0.084         | 0.760  | 0.702         | 0.760  | 0.879  | 0.819          | 0.432  | 0.432  | 0.873          | 0.589  | 0.504                | 0.482         | 0.482          | 0.760  | 0.253             | 0.215           | 0.645  | 0.482  | 0.482             |
| miR-221  | Control | r | 0.771         | 0.600         | 0.086  | 0.771         | 0.600  | <b>0.829*</b> | -0.029 | 0.493  | -0.657         | -0.143 | -0.319 | -0.600         | -0.257 | <b>0.943**</b>       | <b>0.841*</b> | <b>0.943**</b> | -0.029 | 0.600             | 0.543           | -0.086 | -0.086 | 0.314             |
|          |         | p | 0.072         | 0.208         | 0.872  | 0.072         | 0.208  | 0.042         | 0.957  | 0.321  | 0.156          | 0.787  | 0.538  | 0.400          | 0.623  | 0.005                | 0.036         | 0.005          | 0.956  | 0.208             | 0.266           | 0.872  | 0.872  | 0.544             |
|          | TX      | r | 0.250         | -0.036        | -0.357 | 0.145         | 0.000  | -0.036        | 0.071  | -0.321 | -0.107         | -0.286 | -0.107 | -0.700         | -0.107 | 0.072                | 0.036         | 0.036          | -0.286 | -0.036            | 0.036           | 0.286  | -0.071 | -0.036            |
|          |         | p | 0.589         | 0.939         | 0.432  | 0.784         | 1.000  | 0.939         | 0.879  | 0.482  | 0.819          | 0.535  | 0.819  | 0.188          | 0.819  | 0.878                | 0.939         | 0.939          | 0.535  | 0.939             | 0.939           | 0.535  | 0.879  | 0.939             |
| miR-222  | Control | r | 0.143         | -0.214        | -0.429 | -0.214        | 0.000  | -0.143        | -0.679 | -0.432 | -0.393         | -0.179 | -0.396 | -0.600         | -0.214 | -0.214               | -0.360        | -0.214         | -0.364 | -0.143            | -0.071          | -0.679 | -0.679 | -0.250            |
|          |         | p | 0.760         | 0.645         | 0.337  | 0.645         | 1.000  | 0.760         | 0.094  | 0.333  | 0.383          | 0.702  | 0.379  | 0.285          | 0.645  | 0.645                | 0.427         | 0.645          | 0.423  | 0.760             | 0.879           | 0.094  | 0.094  | 0.589             |
|          | TX      | r | <b>0.786*</b> | <b>0.857*</b> | 0.571  | 0.580         | 0.679  | 0.357         | 0.393  | 0.607  | 0.357          | 0.107  | -0.036 | 0.300          | 0.143  | 0.252                | 0.321         | 0.607          | 0.714  | -0.321            | -0.429          | -0.036 | 0.214  | <b>0.786*</b>     |
|          |         | p | 0.036         | 0.014         | 0.180  | 0.228         | 0.094  | 0.432         | 0.383  | 0.148  | 0.432          | 0.819  | 0.939  | 0.624          | 0.760  | 0.585                | 0.482         | 0.148          | 0.071  | 0.482             | 0.337           | 0.939  | 0.645  | 0.036             |

**Table S4.** Associations between milk L/A ratio and diet-modulated miRNAs throughout lactation with offspring body fat in adulthood divided by sex. Statistics: r, Spearman rank coefficient significant at \*,  $p \leq 0.05$ ; \*\*,  $p \leq 0.00$ .

| Milk             |     |   | Male offspring body fat (%) |                 | Female offspring body fat (%) |                |
|------------------|-----|---|-----------------------------|-----------------|-------------------------------|----------------|
|                  |     |   | d60                         | d90             | d60                           | d90            |
| <b>L/A ratio</b> | d5  | r | 0.299                       | 0.262           | 0.266                         | 0.422          |
|                  |     | p | 0.299                       | 0.366           | 0.358                         | 0.132          |
|                  | d10 | r | 0.073                       | 0.020           | 0.373                         | 0.148          |
|                  |     | p | 0.805                       | 0.946           | 0.189                         | 0.614          |
|                  | d15 | r | 0.367                       | 0.486           | <b>0.741**</b>                | <b>0.556*</b>  |
|                  |     | p | 0.197                       | 0.078           | 0.002                         | 0.039          |
| <b>miR-27a</b>   | d5  | r | 0.068                       | -0.275          | 0.002                         | 0.015          |
|                  |     | p | 0.817                       | 0.342           | 0.994                         | 0.958          |
|                  | d15 | r | -0.429                      | <b>-0.741**</b> | <b>-0.560*</b>                | <b>-0.662*</b> |
|                  |     | p | 0.126                       | 0.002           | 0.037                         | 0.010          |
| <b>miR-103</b>   | d5  | r | -0.002                      | -0.332          | 0.046                         | -0.020         |
|                  |     | p | 0.994                       | 0.246           | 0.876                         | 0.946          |
|                  | d15 | r | -0.174                      | <b>-0.657*</b>  | -0.165                        | <b>-0.525*</b> |
|                  |     | p | 0.553                       | 0.011           | 0.573                         | 0.054          |
| <b>miR-200a</b>  | d5  | r | -0.169                      | -0.407          | -0.055                        | -0.204         |
|                  |     | p | 0.563                       | 0.149           | 0.852                         | 0.483          |
|                  | d15 | r | -0.103                      | <b>-0.596*</b>  | -0.011                        | <b>-0.609*</b> |
|                  |     | p | 0.725                       | 0.025           | 0.970                         | 0.021          |
| <b>miR-222</b>   | d5  | r | -0.266                      | <b>-0.534*</b>  | -0.007                        | -0.253         |
|                  |     | p | 0.358                       | 0.049           | 0.982                         | 0.383          |
|                  | d15 | r | -0.257                      | <b>-0.613*</b>  | -0.059                        | <b>-0.582*</b> |
|                  |     | p | 0.375                       | 0.020           | 0.840                         | 0.029          |
